# Supplementary material for: Electrochemical fabrication of nanoporous copper films in choline chloride–urea deep eutectic solvent
Source: Royal Society of Chemistry journal article supplement (doi:10.1039/c5cp01276g), 2015-01-01
Supplement: c5cp01276g1.pdf [file c5cp01276g1.pdf]

## Electronic Supplementary Information

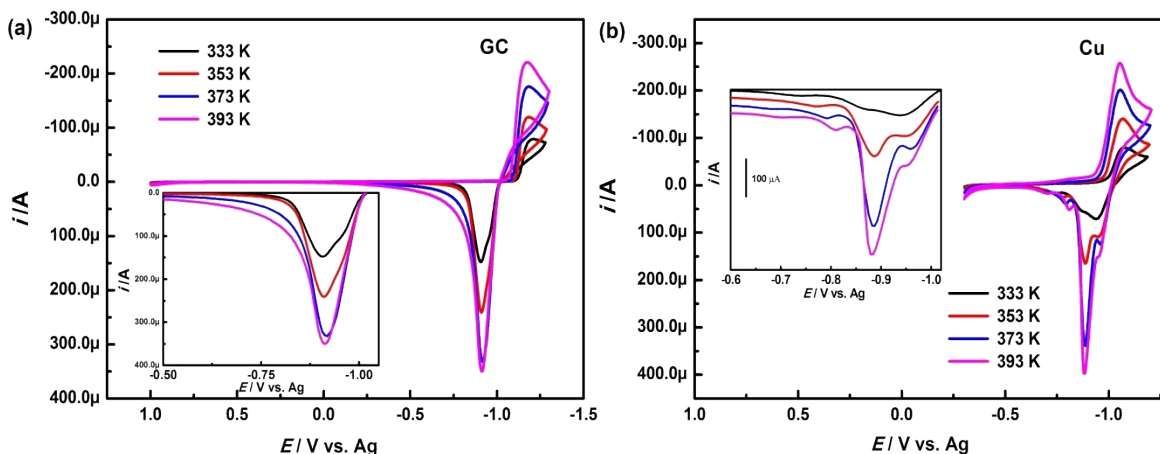

Fig. S1 Comparison of CVs for zinc deposition and stripping recorded at (a) glassy carbon (GC) and (b) copper electrodes from 0.1 M ZnO/ChCl-urea eutectic melt at various temperatures with a scan rate of 0.02 V s<sup>-1</sup>. Inset shows an enlarge vision of the corresponding anodic stripping region.

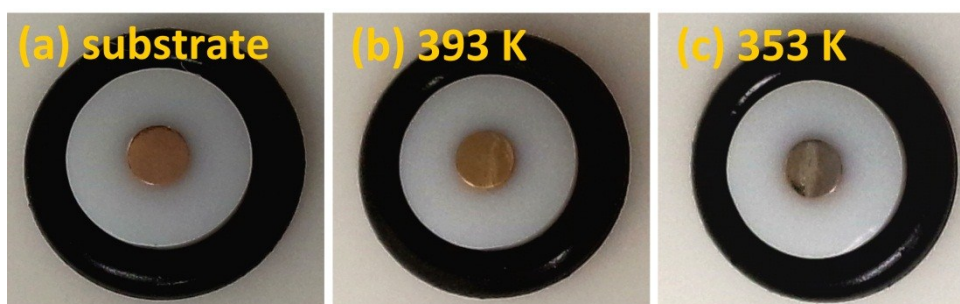

Fig. S2 Optical photographs. Front views of the top surface of copper electrodes ( $\Phi$  2 mm) before (a) and after a single CV measurement at (b) 393 K and (c) 353 K.

Table S1 Effect of temperature on the charge passed during the cathodic deposition process  $Q_c$ , the anodic stripping process,  $Q_a$ , and  $Q_a/Q_c$  recorded at GC and Cu electrodes, respectively, taken from CVs in Fig. S1.

| Temperature/K | $Q_c/10^3 C^{Cu}$ | $Q_a/10^3 C^{Cu}$ | $Q_c/10^3 C^{GC}$ | $Q_a/10^3 C^{GC}$ | $ Q_a/Q_c ^{Cu}$ | $ Q_a/Q_c ^{GC}$ |
|---------------|-------------------|-------------------|-------------------|-------------------|------------------|------------------|
| 333           | -1.022            | 0.742             | -0.813            | 0.752             | 72.60            | 92.50            |
| 353           | -1.720            | 1.210             | -1.587            | 1.440             | 70.35            | 90.74            |
| 373           | -2.543            | 1.663             | -2.558            | 2.229             | 65.40            | 87.14            |
| 393           | -3.373            | 1.918             | -3.139            | 2.567             | 56.86            | 81.78            |

Table S2 Mean  $\pm$  one standard deviation (SD) values of roughness and peak-to-valley height of the samples prepared at different conditions using atomic force microscopy (AFM)

| Current density<br>/mA cm <sup>-2</sup> | Deposition temperature<br>/K | Dealloying temperature<br>/K | Charge density<br>/C cm <sup>-2</sup> | Mean roughness<br>/nm | Mean peak-to-valley height<br>/nm |
|-----------------------------------------|------------------------------|------------------------------|---------------------------------------|-----------------------|-----------------------------------|
| 1.0                                     | 393                          | 393                          | 1.25                                  | 50.2 $\pm$ 4.5        | 237 $\pm$ 22                      |
| 1.0                                     | 393                          | 373                          | 1.25                                  | 48.3 $\pm$ 2.7        | 226 $\pm$ 21                      |
| 1.0                                     | 393                          | 353                          | 1.25                                  | 45.2 $\pm$ 2.1        | 221 $\pm$ 18                      |
| 0.75                                    | 393                          | 393                          | 1.25                                  | 50.7 $\pm$ 4.1        | 326 $\pm$ 23                      |
| 0.50                                    | 393                          | 393                          | 1.25                                  | 53.2 $\pm$ 4.8        | 393 $\pm$ 26                      |
| 1.0                                     | 393                          | 393                          | 0.625                                 | 36.7 $\pm$ 3.1        | 203 $\pm$ 19                      |
| 1.0                                     | 393                          | 393                          | 2.50                                  | 80.6 $\pm$ 6.5        | 405 $\pm$ 28                      |
| 1.0                                     | 373                          | 393                          | 1.25                                  | 48.1 $\pm$ 2.0        | 201 $\pm$ 12                      |
| 1.0                                     | 353                          | 393                          | 1.25                                  | 25.2 $\pm$ 2.2        | 158 $\pm$ 10                      |
